# Supplementary material
Source: MDPI journal article supplement (https://www.mdpi.com/2071-1050/14/16/10214)
Supplement: s1 [file s1]

## Supplementary Data

**Table S1.** Indices of phytosociological attributes for Thirty-nine plant species in the three clusters of *Datura innoxia* dominated communities.

| S. No | Plant Name (Botanical name)                     | PC   | Local Name            | Plant English Name           | Status | Family        | LF  | H   |
|-------|-------------------------------------------------|------|-----------------------|------------------------------|--------|---------------|-----|-----|
| 1     | <i>Datura innoxia</i> Mill.                     | Dain | Batura                | Downy thorn-apple            | NT     | Solanaceae    | H   | P   |
| 2     | <i>Ajuga bracteosa</i> Wall. ex Benth.          | Ajbr | Boti                  | Bugleweed                    | N      | Lamiaceae     | H   | A/P |
| 3     | <i>Alternanthera pungens</i> Kunth              | Alpg | Khaki Boti            | Joyweed                      | I      | Amaranthaceae | H   | A   |
| 4     | <i>Amaranthus viridis</i> L.                    | Amvr | Chalwaye              | Green amaranth               | I      | Amaranthaceae | H   | A   |
| 5     | <i>Artemisia capillaris</i> Thunb.              | Arcp | Spin Jawkay           | Wormwood                     | N      | Asteraceae    | H   | A   |
| 6     | <i>Calendula arvensis</i> L.                    | Clar | Ziargulay             | Field marigold               | N      | Asteraceae    | H   | A   |
| 7     | <i>Calotropis procera</i> (Aiton) W.T.Aiton     | Clpr | Spalmay               | king's crown                 | N      | Apocynaceae   | S   | P   |
| 8     | <i>Cannabis sativa</i> L.                       | Cast | Bhang/ Merijwana      | Hemp                         | I      | Cannabaceae   | H   | A   |
| 9     | <i>Carthamus oxycantha</i> M.Bieb.              | Crox | Kareza/Pohli          | Distaff thistles             | NT     | Asteraceae    | H   | A   |
| 10    | <i>Centaurea cyanus</i> L.                      | Cent | Gul Tokna/Neeli Botle | Cornflower/Bachelor's button | NT     | Asteraceae    | H   | A   |
| 11    | <i>Chenopodium album</i> L.                     | Chal | Sarme                 | Goose foot                   | N      | Amaranthaceae | H   | A   |
| 12    | <i>Chrozophora tinctoria</i> (L.) Raf.          | Chtn | _____                 | Dyer's croton /Turnsole      | N      | Euphorboaceae | H/S | A/P |
| 13    | <i>Cirsium arvense</i> (L.) Scop.               | Crar | Kandai                | Creeping thistle             | N      | Asteraceae    | H   | P   |
| 14    | <i>Cornus macrophylla</i> Wall.                 | Coma | Khadang               | large-leafed dogwood         | N      | Cornaceae     | S   | P   |
| 15    | <i>Cynodon dactylon</i> (L.) Pers.              | Cydy | Kabal                 | Grass/Og's tooth grass       | N      | Poaceae       | H   | P   |
| 16    | <i>Dodonaea viscosa</i> Jacq.                   | Dovc | Ghwaraskay            | Soapberry                    | N      | Sapindaceae   | S   | P   |
| 17    | <i>Eryngium caeruleum</i> M.Bieb.               | Erco | Manzari Panja         | Eryngo/Amethyst sea holly    | N      | Apiaceae      | H   | A/P |
| 18    | <i>Gymnosporia royleana</i> Wall. ex M.A.Lawson | Gyry | _____                 | _____                        | N      | Celastraceae  |     |     |
| 19    | <i>Heliotropium indicum</i> L.                  | Hein | Wasnal                | Salt heliotrope              | N      | Boraginaceae  | H   | P   |
| 20    | <i>Medicago denticulata</i> Willd.              | Medn | Shpeshtare            | Toothed medick               | N      | Fabaceae      | H   | A   |
| 21    | <i>Mirabilis jalapa</i> L.                      | Mijp | Gul bada              | Japanese 4 'o' clock         | NT     | Nyctaginaceae | H   | P   |
| 22    | <i>Morus alba</i> L.                            | Mral | Spin Toot             | Mulberry                     | I      | Moraceae      | T   | P   |
| 23    | <i>Origanum vulgare</i> L.                      | Ogyg | Shamakay              | Oregano                      | N      | Lamiaceae     | H   | P   |
| 24    | <i>Otostegia limbata</i> (Benth.)               | Oslm | Spin Azghay           | Otostegia                    | N      | Lamiaceae     | H   | A   |
| 25    | <i>Oxalis corniculata</i> L.                    | Oxcr | Manzakay Tarookay     | Sleeping beauty              | N      | Oxalidaceae   | H   | A   |
| 26    | <i>Parthenium hysterophorus</i> L.              | Pahy | Carrot grass          | White top / Congress grass   | I      | Asteraceae    | H   | A   |
| 27    | <i>Persicaria maculosa</i> Gray                 | Prmu | Sur Pulpulak          | Lady's thumb                 | NT     | Polygonaceae  | H   | A   |
| 28    | <i>Ricinus communis</i> L.                      | Ricm | Arhanda               | Castor bean                  | N      | Euphorboaceae | S   | P   |
| 29    | <i>Rumex hastatus</i> D. Don                    | Rmhs | Tarookay              | Arrowleaf Dock               | N      | Polygonaceae  | H   | A   |
| 30    | <i>Salvia moorcroftiana</i> Wall. ex Benth.     | Slmc | Karghwag              | Kashmir Salvia               | N      | Lamiaceae     | H   | P   |
| 31    | <i>Silybum marianum</i> (L.) Geartn.            | Simr | Wrojakai              | Milk thistle/Mary thistle    | I      | Asteraceae    | H   | A   |
| 32    | <i>Solanum nigrum</i> L.                        | Song | Kachmcho              | Black nightshade             | NT     | Solanaceae    | H   | A   |

|    |                                                                |      |            |                               |    |                  |     |   |
|----|----------------------------------------------------------------|------|------------|-------------------------------|----|------------------|-----|---|
| 33 | <i>Trianthema portulacastrum</i> L.                            | Trpr | —          | Glack/Giant pigweed           | I  | Aizoaceae        | H   | A |
| 34 | <i>Tribulus terrestris</i> L.                                  | Trtr | Markundai  | Cat's-head /Devil's eyelashes | N  | Zygophyllaceae   | H   | A |
| 35 | <i>Verbascum thapsus</i> L.                                    | Vrth | khardhag   | Jangli Tamak/ Sfaid bhang     | NT | Scrophulariaceae | S   | B |
| 36 | <i>Verbesina encelioides</i> (Cav.) Benth. & Hook.f. ex A.Gray | Veen | Nwar paras | Wild sunflower                | CA | Asteraceae       | H   | A |
| 37 | <i>Xanthium strumarium</i> L.                                  | Xnst | Geshkey    | Cocklebur                     | I  | Asteraceae       | H   | A |
| 38 | <i>Zanthoxylum armatum</i> DC.                                 | Xnar | Dambara    | Winged prickly ash            | N  | Rutaceae         | S/T | P |

**Note:** PC (Plant code), H (Habit), LF (Life form), N (Naturalised), I (Invasive), NT (Native), CA (Casual alien), H (Herb), H/S (Herb/Shrub), S (Shrub), S/T (Shrub/Tree), P (Perennial), A (Annual), A/P (Annual/Perennial), B (Biennial).

**Table S2:** Axes summary, correlation and biplot scores of the of the environmental and climatic variables affecting the *Datura innoxia* communities

| Axis                           |         | Axis 1        | Axis 2 | Axis 3 |
|--------------------------------|---------|---------------|--------|--------|
| Eigenvalue                     |         | 0.49          | 0.41   | 0.37   |
| Variance in species data       |         |               |        |        |
| % of variance explained        |         | 17            | 14.1   | 12.7   |
| Cumulative % explained         |         | 17            | 31     | 43.7   |
| Pearson Correlation, Spp-Envt* |         | 0.997         | 0.999  | 0.998  |
| Correlation                    |         | Biplot scores |        |        |
| Variable                       |         | Axis 1        | Axis 2 | Axis 3 |
| 1                              | Elev.   | −0.192        | −0.656 | −0.04  |
| 2                              | CL%     | 0.169         | 0.211  | −0.069 |
| 3                              | SL%     | −0.33         | −0.397 | 0.077  |
| 4                              | SN%     | 0.288         | 0.342  | −0.049 |
| 5                              | pH(1:5) | 0.119         | −0.064 | 0.389  |
| 6                              | OM%     | 0.328         | 0.134  | −0.332 |
| 7                              | L %     | −0.307        | −0.087 | 0.032  |
| 8                              | N       | −0.023        | 0.435  | −0.204 |
| 9                              | EC      | −0.283        | 0.324  | −0.45  |
| 10                             | AW      | −0.301        | −0.421 | 0.139  |
| 11                             | MYT     | −0.174        | 0.798  | −0.024 |
| 12                             | AYH     | 0.06          | 0.764  | −0.192 |
| 13                             | DLH     | 0.205         | 0.799  | −0.155 |
| 14                             | EI      | −0.49         | −0.466 | 0.425  |
| 15                             | CF      | 0.302         | 0.83   | −0.139 |
| 16                             | GI      | −0.39         | −0.695 | 0.151  |
| 17                             | TD      | 0.421         | 0.708  | −0.136 |
| 18                             | S       | −0.396        | 0.171  | 0.121  |
| 19                             | H       | 0.317         | −0.462 | −0.293 |
| 20                             | J       | 0.288         | −0.108 | −0.215 |
